# Supplementary material for: Current knowledge on enzymatic PET degradation and its possible application to waste stream management and other fields
Source: PubMed Central journal article supplement (PMC6505623; doi:10.1007/s00253-019-09717-y), 2019-04-08
Supplement: 253_2019_9717_MOESM1_ESM.pdf [file 253_2019_9717_MOESM1_ESM.pdf]

Mini-review for Applied Microbiology and Biotechnology

Supporting information

**Current knowledge on enzymatic PET degradation and its possible application to design waste stream management and other applications**

**Fusako Kawai,<sup>1,4\*</sup> Takeshi Kawabata,<sup>2</sup> Masayuki Oda<sup>3</sup>**

<sup>1</sup>Center for Fiber and Textile Science, Kyoto Institute of Technology, 1 Hashigami-cho, Matsugasaki, Sakyo-ku, Kyoto, Kyoto 606-8585, Japan

<sup>2</sup>Institute for Protein Research, Osaka University, 3-2 Yamadaoka, Suita, Osaka 565-0871, Japan

<sup>3</sup>Graduate School of Life and Environmental Sciences, Kyoto Prefectural University, 1-5 Hangi-cho, Shimogamo, Sakyo-ku, Kyoto, Kyoto 606-8522, Japan

<sup>4</sup>Present address: Emeritus Professor, Okayama University, Japan

\*Corresponding author: Fusako Kawai

E-mail: [fkawai@kit.ac.jp](mailto:fkawai@kit.ac.jp). Tel and Fax: +81-75-703-8576.

*Table S1.* Reaction products from PET-GF, PET-S and PET microfiber at 30 °C.

The incubations were performed in a reaction mixture (1 ml) including Cut190\*(Q138A/D250C-E296C), 2 μM; CaCl<sub>2</sub>, 2.5 mM; glycerol, 24%; HEPES buffer (pH 8.5), 100 mM; and each PET (the same as previously described; Oda et al. 2018) under shaking in a water bath at 30 °C. At intervals, an aliquot of the reaction mixture was withdrawn, the absorbance of which was measured at 240 nm ( $\epsilon=1.38 \times 10^4$ ) (Oda et al. 2018).

| Incubation<br>time at 30 °C<br>(h) | Products |                             |                               |          |                             |                               |            |                                |                               |
|------------------------------------|----------|-----------------------------|-------------------------------|----------|-----------------------------|-------------------------------|------------|--------------------------------|-------------------------------|
|                                    | PET-GF   |                             |                               | PET-S    |                             |                               | Microfiber |                                |                               |
|                                    | μmole/ml | μmole/both<br>sides of 6mmΦ | degradation<br>% <sup>a</sup> | μmole/ml | μmole/both<br>sides of 6mmΦ | degradation<br>% <sup>b</sup> | μmole/ml   | μmole/as both<br>sides of 6mmΦ | degradation<br>% <sup>c</sup> |
| 22                                 | 0.015    | 0.015                       | 0.03                          | 0.013    | 0.013                       | 0.01                          | 0.13       | 0.037                          | 2.3                           |
| 44                                 | 0.023    | 0.023                       | 0.05                          | 0.016    | 0.016                       | 0.01                          | 0.42       | 0.12                           | 7.4                           |
| 66                                 | 0.027    | 0.027                       | 0.06                          | 0.014    | 0.014                       | 0.01                          | 0.84       | 0.24                           | 14.8                          |
| 93                                 | 0.027    | 0.027                       | 0.06                          | 0.014    | 0.014                       | 0.01                          | 1.25       | 0.35                           | 22.0                          |
| 113                                | 0.041    | 0.041                       | 0.09                          | 0.013    | 0.013                       | 0.01                          | 1.41       | 0.40                           | 24.8                          |

<sup>a</sup> calculated against 8.4 mg (43.8 μmoles as MHET unit; crystallinity of 6.3%; 6mmΦ×0.25mm-thick).

<sup>b</sup> calculated against 22.7 mg (118 μmoles as MHET unit; crystallinity of 8.4%; 6mmΦ×0.6mm-thick).

<sup>c</sup> calculated against 1.1 mg (5.72 μmoles as MHET unit; crystallinity of 14.1%; approximately 1cm-square).

The amounts of products from PET-GF and PET-S were almost kept constant in 22-113 h at approximately 0.02-0.04 and 0.01-0.02 μmole/both side of 6mmΦ, respectively. On the other hand, hydrolysis of microfiber PET increased with increased reaction time, finally reaching 24.8% of degradation in 113 h. Degradation of microfiber is approximately ten times and more as much as those of PET-GF and PET-S, although crystallinities of PET-GF and PET-S are approximately 45% and 60% of the value of microfiber, respectively. These results indicate that orientation/surface topology of microfiber is quite different (no orientation) from those of two films, which are supported by that microfiber absorbed a lot of water, resulting in the approximately duplicate width after incubation, as shown below. In addition, hydrolysis of PET films is limited at 30 °C, corresponding to the surface hydrophilization level, although microfiber is hydrolyzed by the surface erosion level even at 30 °C.

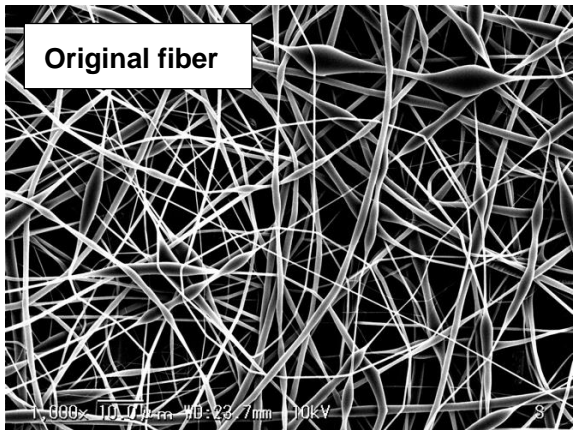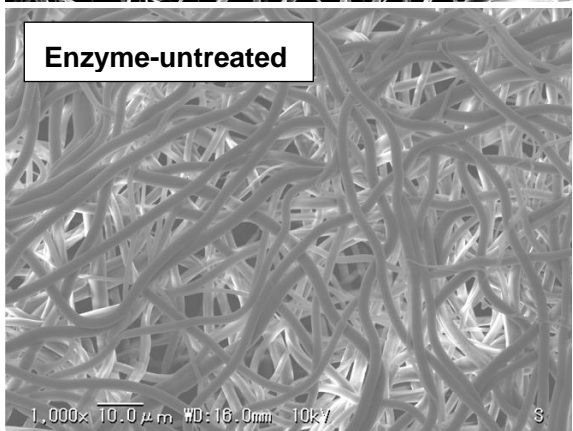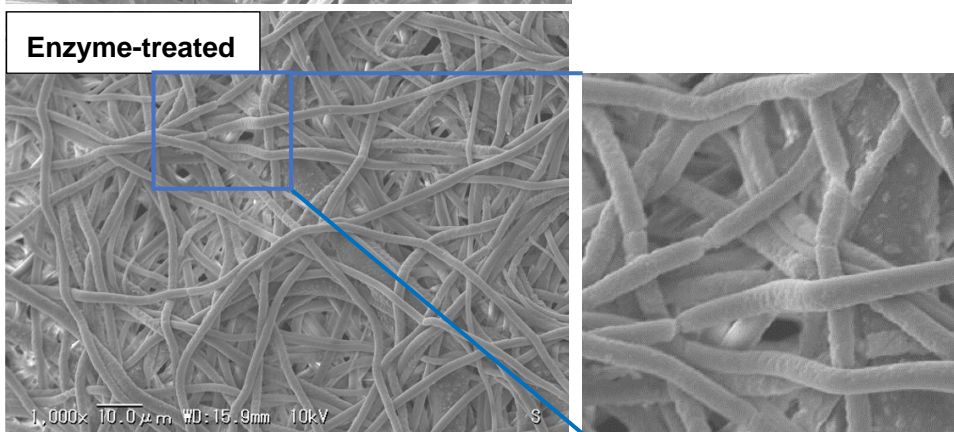

Enzyme reactions and SEM observation were performed as described previously (Oda et al. 2018).

Table S2. Comparison of degradation abilities of PETase and Cut190\* toward PET films

| Enzyme used                                           | PET film<br>(crystallinity)        | Film<br>thickness | Film<br>weight | unit (MHET) in<br>the film | Total products in a<br>reaction mixture | Degradation<br>rate (%)    | Products/cm <sup>2</sup>   |
|-------------------------------------------------------|------------------------------------|-------------------|----------------|----------------------------|-----------------------------------------|----------------------------|----------------------------|
| PETase <sup>a</sup>                                   | Synthesized <sup>a</sup><br>(1.9%) | 0.2 mm            | 7.57 mg        | 39.4 μmoles                | 0.09 μmoles/300 μl                      | 0.23                       | 0.159 μmoles               |
| Cut190* <sup>b</sup><br>(Cut190* mutant) <sup>b</sup> | PET-GF <sup>b</sup><br>(6.3%)      | 0.25 mm           | 8.40 mg        | 43.7 μmoles                | 7.01 μmoles/ml<br>(14.7 μmoles/ml)      | 16.0 ± 1.4<br>(33.6 ± 3.0) | 12.3 ± 1.2<br>(28.6 ± 2.3) |
| Cut190* <sup>b</sup>                                  | PET-S <sup>b</sup><br>(8.4%)       | 0.6 mm            | 22.7 mg        | 118 μmoles                 | 29.2 μmoles/ml                          | 59.2 ± 2.1 <sup>c</sup>    | 46.9 ± 1.6                 |

<sup>a</sup> Data were calculated from Yoshida et al. 2016. PET film (0.2 mm-thick, 6mmΦ: 56.52 mm<sup>2</sup> as both sides; density, 1.3378 g/cm<sup>3</sup>) was incubated in 300 μl with 50 nM PETase in pH 7.0 buffer for 18 h at 30 °C. Total amount of products was shown in Fig. 2D (b) as approximately 0.3 mM.

<sup>b</sup> PET-GF and PET-S used are the same as previously described (Oda et al. 2018). The average weight of 6 mmΦ PET-GF was 8.4 mg. The weight of PET-S was calculated as 22.7 mg. The incubations were performed with Cut190\* at 65 °C for PET-GF (70 °C with the Cut190\* mutant) and at 60 °C for PET-S. The values were cited from Table 3 in Oda et al. 2018.

<sup>c</sup> Calculated as 0.25 mm-thick.

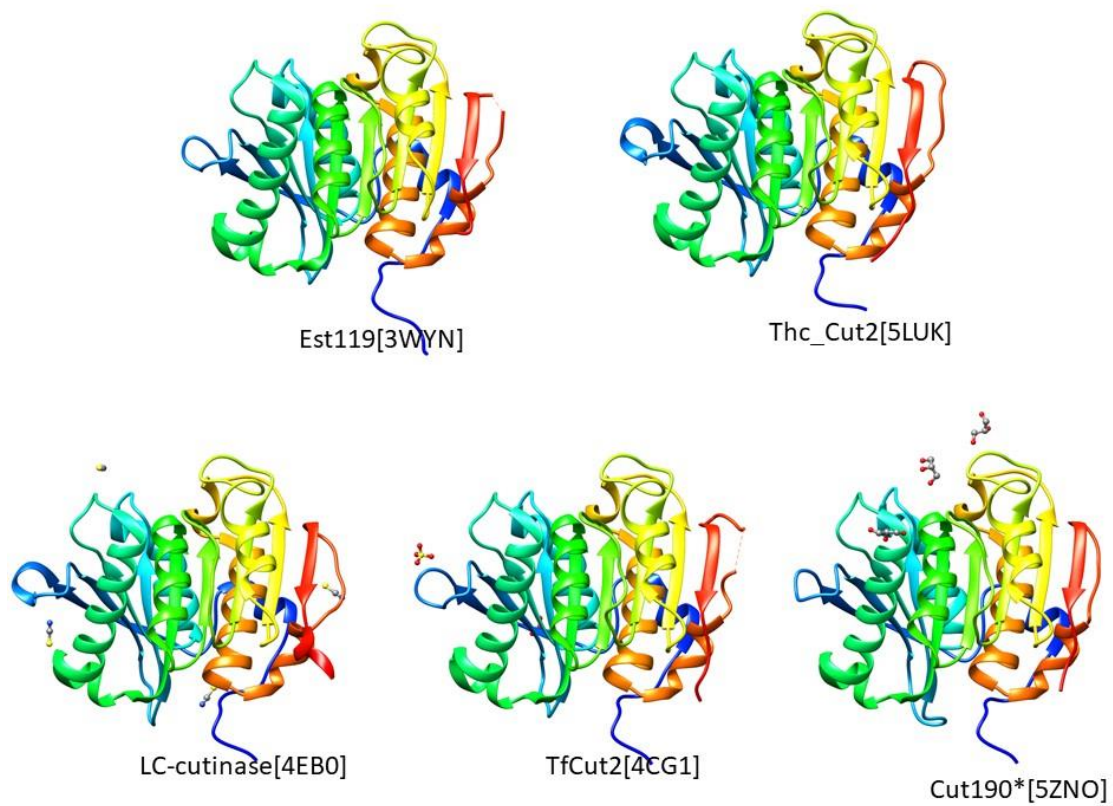

*Figure S1.* Crystal structures of PET hydrolases and homologous enzymes from actinomycetes. PDB IDs are shown in brackets.



*Figure S2.* Multiple 3D structural alignment of PET hydrolases. The program MATRAS was employed to generate 3D alignments (Kawabata 2003). The positions of C-terminal cysteine were manually modified. The consensus secondary structures are shown on the top of the alignment, conserved sites are shown as asterisks on the bottom. Following PDB IDs are used for the alignment: 4CG1 for TfCut2, 3VIS for Est1, 4WFK for Cut190, 5XG0 for PETase and 4EB0 for LC-cutinase. Amino acids comprising the catalytic triad are boxed in red.



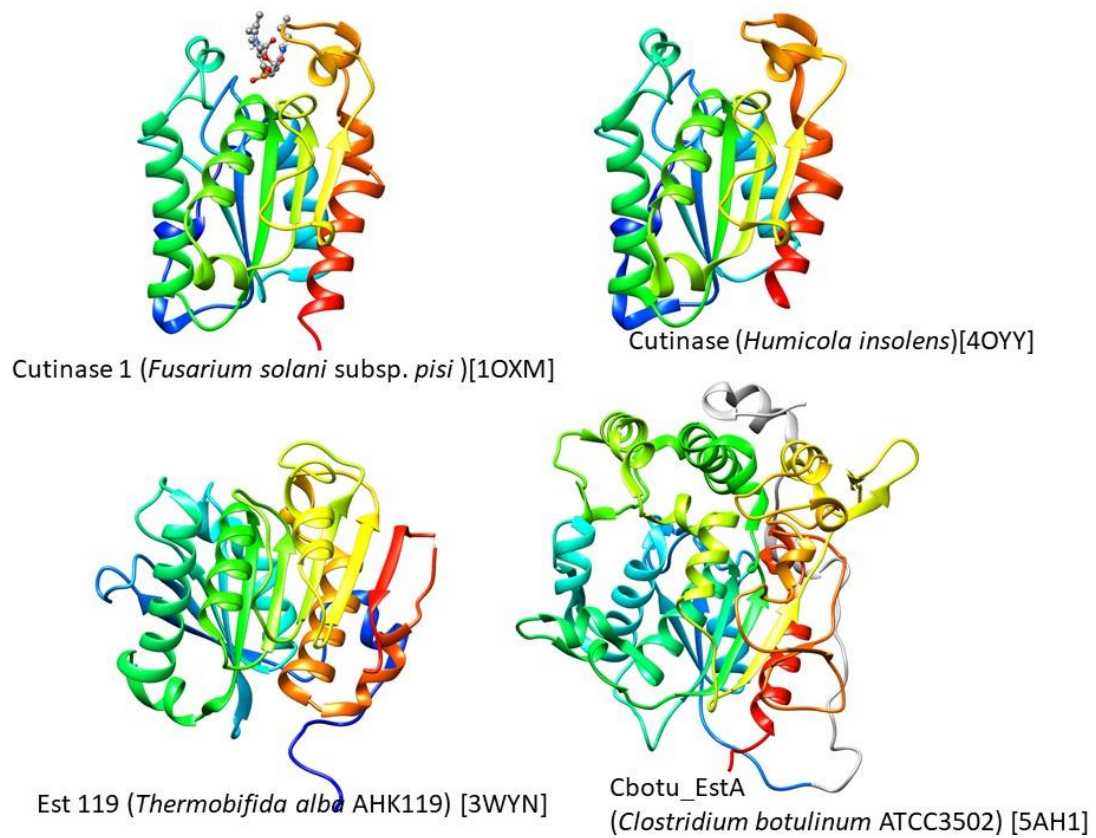

*Figure S3.* Comparison of cutinase-related structures. The truncated N-terminal 71 residues of Cbotu\_EstA are shown in gray. Strain names are shown in parentheses and PDB IDs are shown in brackets.



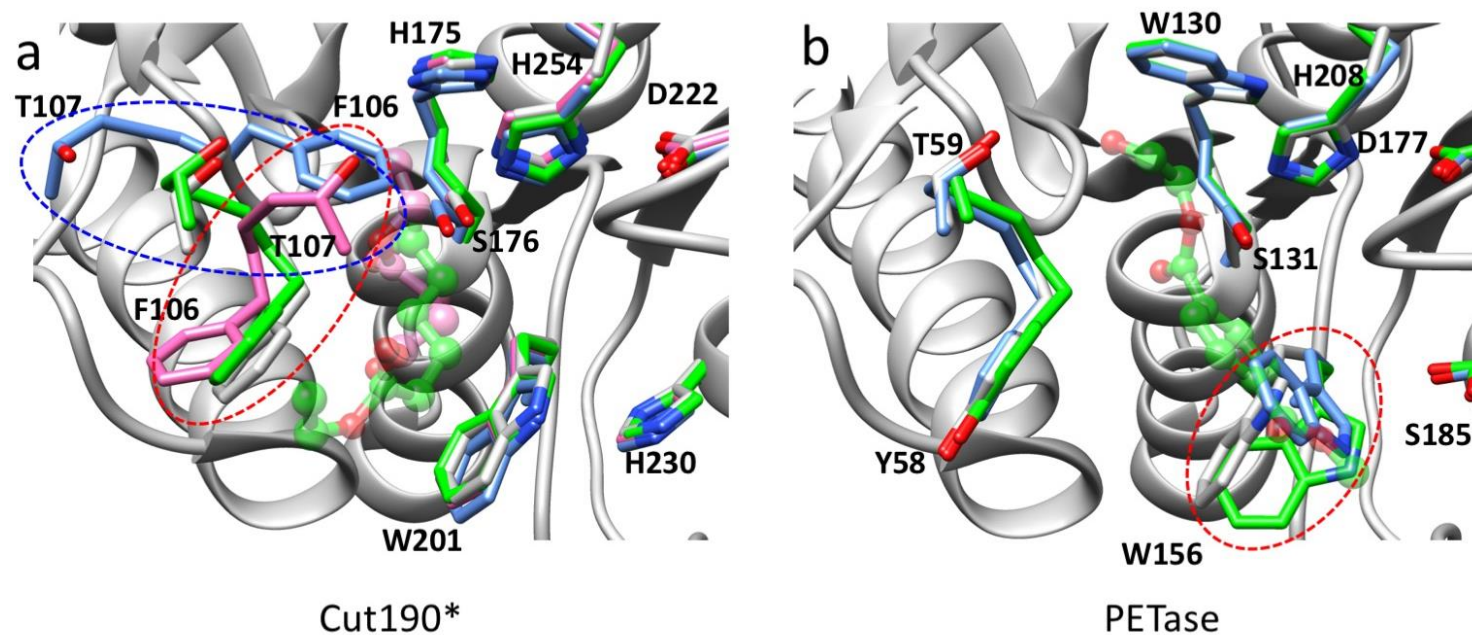

*Figure S4.* Comparison of catalytic site 3D structures of Cut190\* and PETase. **a** Four structures of Cut190\*. The structures are colored as follows: 4WFK (apo structure with  $\text{Ca}^{2+}$  on site1) in gray, 4WFI (apo structure without  $\text{Ca}^{2+}$ ) in blue, 5ZRR (with ethyl succinate and four  $\text{Zn}^{2+}$ ) in pink, and 5ZRS (with ethyl adipate,  $\text{Ca}^{2+}$  on site1 and three  $\text{Zn}^{2+}$ ) in green. The substrates (ethyl succinate and ethyl adipate) are displayed as transparent ball & stick models. Positions of F106 and T106 are quite different among the structures. **b** Three structures of PETase. The structures are colored as follows: 5XJH (apo structure) in gray, 5XG0 (apo structure) in blue, and 5XH3 (with HEMT) in green. The substrate HEMT is displayed as a transparent model. Sidechain conformations of W156 are wobbling among the structures.

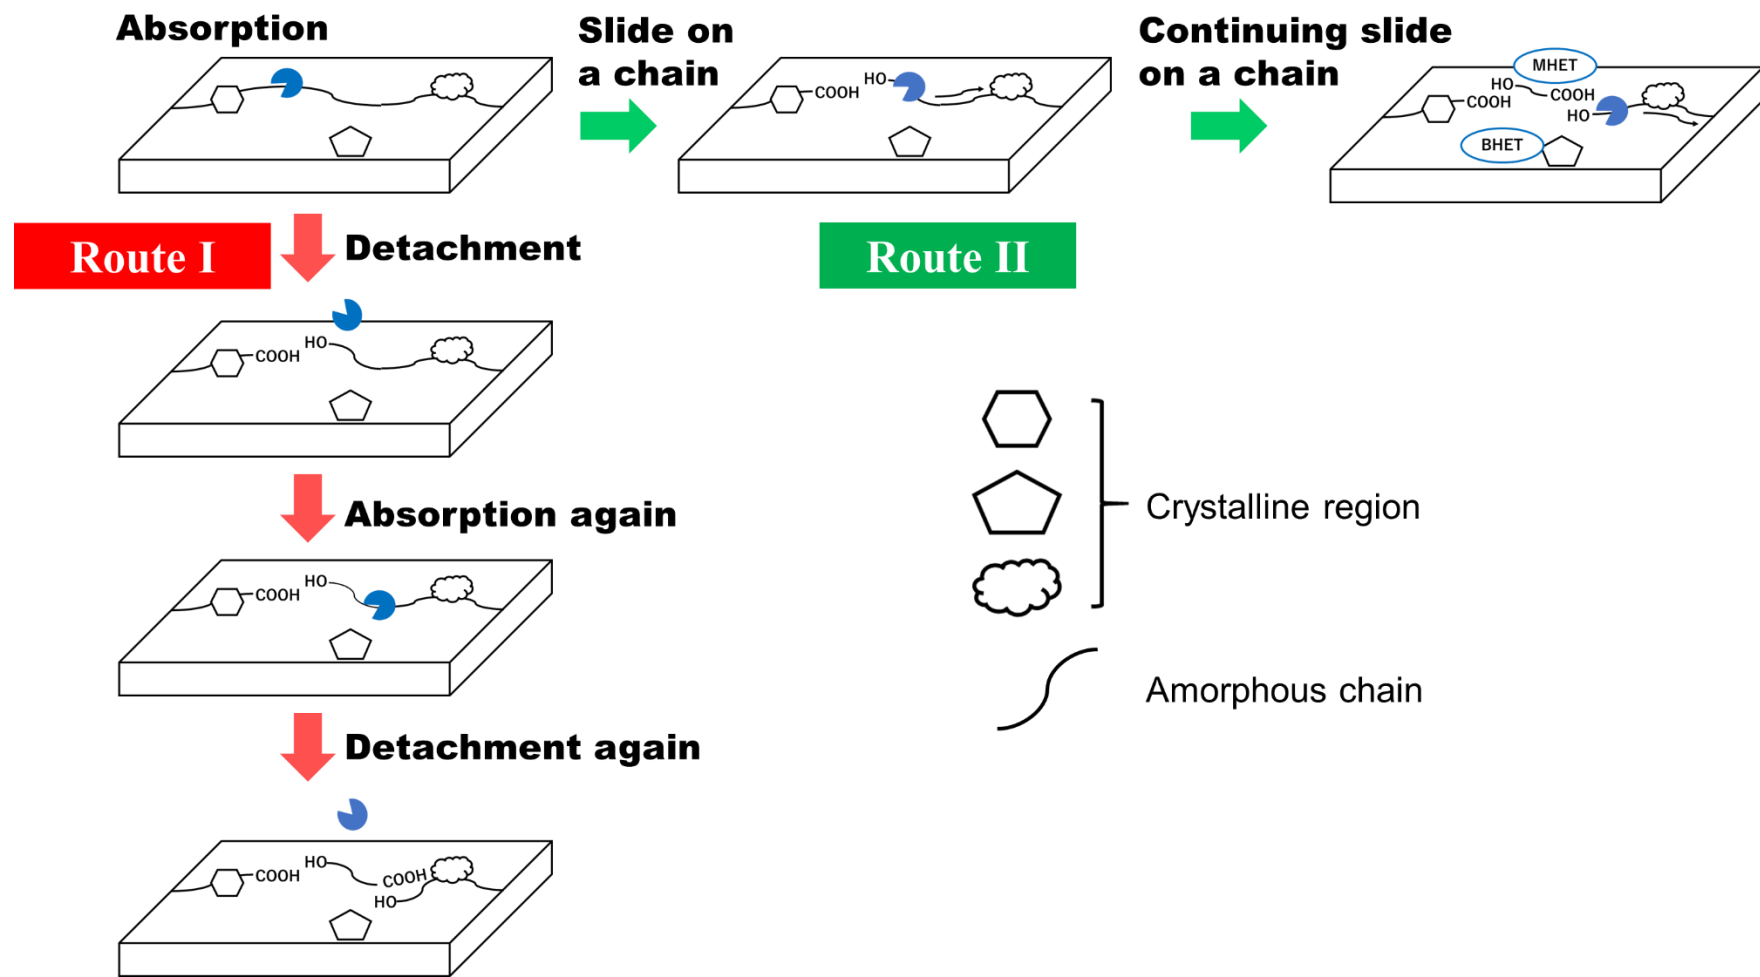

Figure S5. Presumed mechanism of PET hydrolysis by Cut190\*

## References

**Kawabata T** (2003) MATRAS: a program for protein 3D structure comparison. *Nucleic Acids Res* **31**:3367-3369

**Oda M, Yamagami Y, Inaba S, Oida T, Yamamoto M, Kitajima S, Kawai F** (2018) Enzymatic hydrolysis of PET: functional roles of three Ca<sup>2+</sup> ions bound to a cutinase-like enzyme, Cut190\*, and its engineering for improved activity. *Appl Microbiol Biotechnol* **102**: 10067-10077

**Yoshida S, Hiraga K, Takehana T, Taniguchi I, Yamaji H, Maeda Y, Toyohara K, Miyamoto K, Oda K** (2016) A bacterium that degrades and assimilates poly(ethylene terephthalate). *Science* **351**: 1196-1199
